# Supplementary material for: Diverging maternal and infant cord antibody functions from SARS-CoV-2 infection and vaccination in pregnancy
Source: PubMed Central journal article supplement — bioRxiv. 2023 May 2:2023.05.01.538955. Preprint. [Version 1] doi: 10.1101/2023.05.01.538955 (PMC10187183; doi:10.1101/2023.05.01.538955), 2023-05-02
Supplement: NIHPP2023.05.01.538955v1-supplement-2.pdf [file NIHPP2023.05.01.538955v1-supplement-2.pdf]

Supplemental Table 1. Additional clinical characteristics of study patients

| <b>Characteristic</b>                            | <b>Infection<br/>n = 22</b> | <b>Vaccine<br/>n = 19</b> | <b>Vaccine<br/>and<br/>infection<br/>n = 28</b> | <b>P value</b> |
|--------------------------------------------------|-----------------------------|---------------------------|-------------------------------------------------|----------------|
| Nulliparous                                      | 9 (41)                      | 5 (26)                    | 3 (11)                                          | 0.0481         |
| Pregestational diabetes                          | 3 (14)                      | 2 (11)                    | 8 (29)                                          | 0.266          |
| Chronic hypertension                             | 3 (14)                      | 5 (26)                    | 4 (14)                                          | 0.562          |
| Preeclampsia with severe features                | 3 (14)                      | 2 (11)                    | 7 (25)                                          | 0.444          |
| Chorioamnionitis                                 | 2 (9)                       | 0 (0)                     | 1 (4)                                           | 0.481          |
| Prelabor rupture of membranes                    | 2 (9)                       | 0 (0)                     | 5 (18)                                          | 0.139          |
| Induction of labor                               | 13 (59)                     | 8 (42)                    | 12 (43)                                         | 0.439          |
| Cesarean delivery                                | 7 (32)                      | 11 (58)                   | 13 (46)                                         | 0.241          |
| EGA <37 weeks at delivery                        | 7 (32)                      | 4 (21)                    | 6 (21)                                          | 0.684          |
| Infant birth weight <10 <sup>th</sup> percentile | 2 (9)                       | 3 (16)                    | 5 (18)                                          | 0.690          |
| Neonatal intensive care unit admission           | 4 (18)                      | 0 (0)                     | 5 (18)                                          | 0.130          |

Data shown as n (%), mean  $\pm$  standard deviation (SD), or median (Q1-Q3) as appropriate.

BMI= body mass index, EGA= estimated gestational age, NICU= neonatal intensive care unit

Supplemental Table 2: Comparison of clinical characteristics of individuals receiving mRNA-1273 and BNT1262b2

| <b>Characteristic</b>                            | <b>mRNA-1273<br/>n = 4</b> | <b>BNT1262b2<br/>n = 43</b> |
|--------------------------------------------------|----------------------------|-----------------------------|
| Age, years                                       | 36.8 (4.7)                 | 33.3 (6.4)                  |
| Race/ethnicity                                   |                            |                             |
| Hispanic                                         | 4 (100)                    | 41 (95)                     |
| Black, non-Hispanic                              | 0 (0)                      | 1 (2)                       |
| White, non-Hispanic                              | 0 (0)                      | 1 (2)                       |
| Other                                            | 0 (0)                      | 0 (0)                       |
| Nulliparous                                      | 0 (0)                      | 8 (19)                      |
| BMI at first visit, kg/m <sup>2</sup>            | 37.5 (34.5-39.6)           | 32.1 (28.5-36.4)            |
| SARS-CoV-2 in pregnancy                          | 3 (75)                     | 25 (58)                     |
| mRNA Vaccination in pregnancy booster            | 2 (50)                     | 7 (16)                      |
| Pregestational diabetes                          | 2 (50)                     | 8 (19)                      |
| Chronic hypertension                             | 1 (25)                     | 8 (19)                      |
| Preeclampsia with severe features                | 2 (50)                     | 7 (16)                      |
| Chorioamnionitis                                 | 0 (0)                      | 1 (2)                       |
| Induction of labor                               | 1 (25)                     | 19 (44)                     |
| Cesarean                                         | 3 (75)                     | 21 (49)                     |
| EGA at delivery, weeks                           | 29.9 (27.5-33.2)           | 25.4 (16.8-29.8)            |
| EGA<37 weeks delivery                            | 2 (50)                     | 8 (19)                      |
| Infant birth weight <10 <sup>th</sup> percentile | 2 (50)                     | 6 (14)                      |
| NICU admission                                   | 1 (25)                     | 4 (9)                       |
| Male infant sex                                  | 1 (25)                     | 26 (60)                     |

Data shown as n (%), mean ± standard deviation (SD), or median (Q1-Q3) as appropriate.

BMI= body mass index, EGA= estimated gestational age, NICU= neonatal intensive care unit

Supplemental Table 3. Characteristics of study cohort compared with deliveries at Parkland Health, 2021

| <b>Characteristic</b>                            | <b>Study patients<br/>n = 69</b> | <b>Deliveries 2021<br/>n = 11,170</b> |
|--------------------------------------------------|----------------------------------|---------------------------------------|
| Age, years                                       | 31.9 ± 6.8                       | 27.5 ± 6.4                            |
| Race/ethnicity                                   |                                  |                                       |
| Hispanic                                         | 65 (94)                          | 8643 (77)                             |
| Black, non-Hispanic                              | 3 (4)                            | 1799 (16)                             |
| White, non-Hispanic                              | 1 (1)                            | 448 (4)                               |
| Other                                            |                                  | 280 (3)                               |
| Nulliparous                                      | 17 (25)                          | 3431 (31)                             |
| BMI at first visit, kg/m <sup>2</sup>            | 32 (28-37)                       | 29 (25-33)                            |
| Documented SARS-CoV-2 in pregnancy               | 50 (72)                          | 2681 (24)                             |
| Any mRNA vaccination in pregnancy                | 47 (68)                          | 2772 (25)                             |
| Pregestational diabetes                          | 13 (19)                          | 210 (2)                               |
| Chronic hypertension                             | 12 (17)                          | 847 (8)                               |
| Preeclampsia with severe features                | 12 (17)                          | 1158 (10)                             |
| Chorioamnionitis                                 | 3 (4)                            | 911 (8)                               |
| Prelabor rupture of membranes                    | 7 (10)                           | 2444 (22)                             |
| Induction of labor                               | 33 (48)                          | 3047 (27)                             |
| Cesarean delivery                                | 31 (45)                          | 3248 (29)                             |
| EGA at delivery, weeks                           | 38 (37-38)                       | 39 (38-40)                            |
| EGA <37 weeks at delivery                        | 17 (25)                          | 1057 (9)                              |
| Infant birth weight <10 <sup>th</sup> percentile | 10 (14)                          | 1173 (11)                             |
| NICU admission                                   | 9 (13)                           | 572 (5)                               |
| Male infant sex                                  | 39 (57)                          | 5774 (52)                             |

Data shown as n (%), mean ± standard deviation (SD), or median (Q1-Q3) as appropriate.

BMI= body mass index, EGA= estimated gestational age, NICU= neonatal intensive care unit
